# Supplementary material
Source: PubMed Central journal article supplement (PMC7315412)
Supplement: ao0c00859_si_001.pdf [file ao0c00859_si_001.pdf]

## **Global Proteomics Analysis Of Circulating Extracellular Vesicles Isolated From Lung Transplant Recipients**

Sandhya Bansal<sup>1§</sup>, Marissa McGilvrey<sup>2§</sup>, Krystine Garcia-Mansfield<sup>2</sup>, Ritin Sharma<sup>2</sup>, Ross M. Bremner<sup>1</sup>, Michael A. Smith<sup>1</sup>, Ramsey Hachem<sup>3</sup>, Patrick Pirrotte<sup>2†</sup>, Thalachallour Mohanakumar<sup>1†\*</sup>

<sup>1</sup>Norton Thoracic Institute, St. Joseph's Hospital and Medical Center, Phoenix, AZ

<sup>2</sup>Collaborative Center for Translational Mass Spectrometry (CCTMS), Translational Genomics Research Institute (TGen), Phoenix, AZ

<sup>3</sup>Department of Medicine, Washington University School of Medicine, St. Louis, MO

§These authors contributed equally to the work.

†Co-senior authors



## Supporting Information

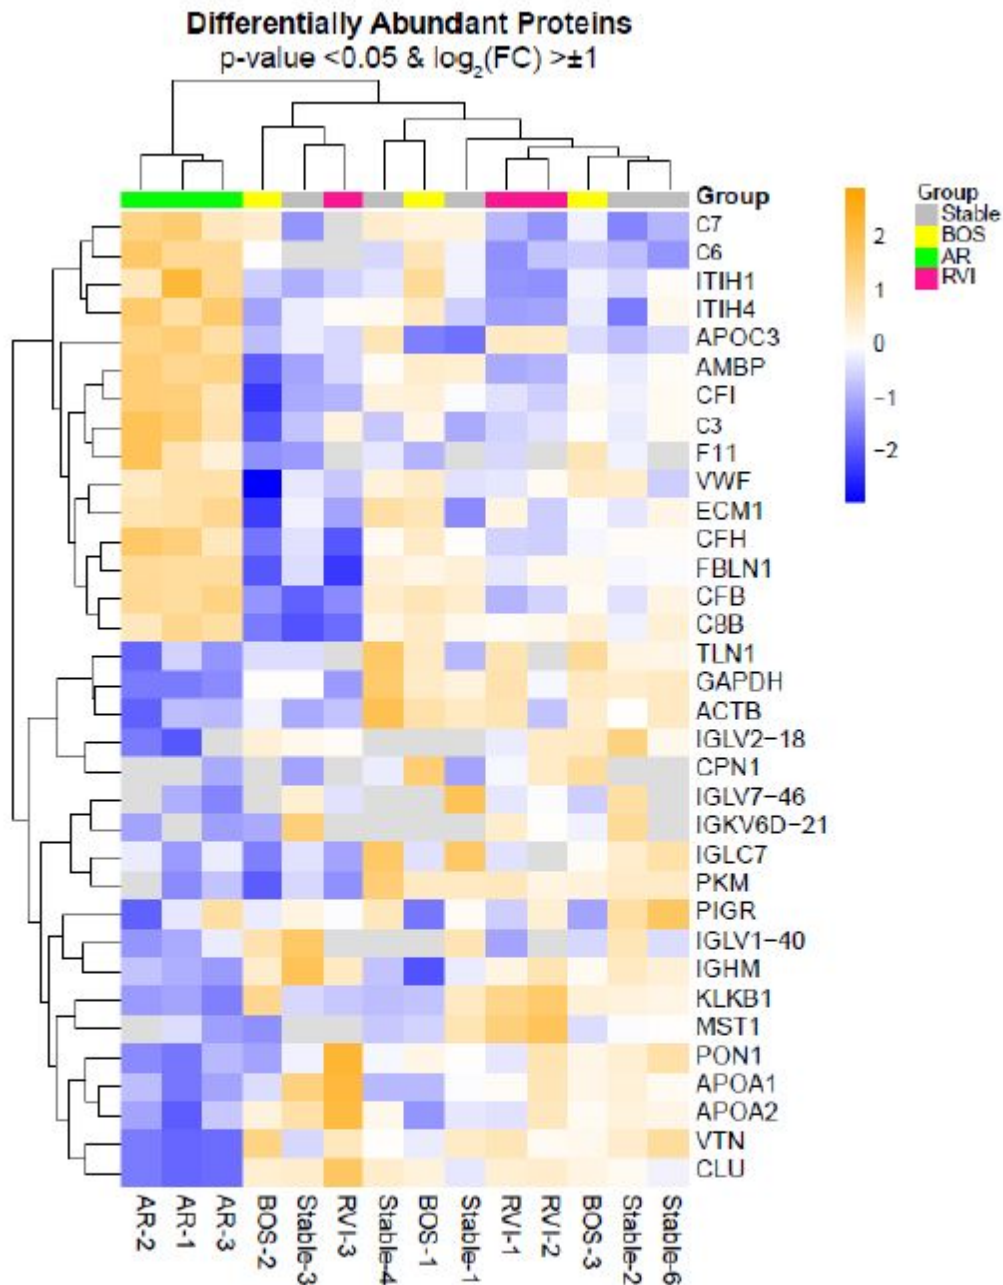

**Figure S1:** Unsupervised clustering of lung transplant conditions from 35 significant proteins in lung transplant recipients with bronchiolitis obliterans syndrome (BOS), acute rejection (AR), and respiratory viral infection (RVI) compared to stable lung transplant recipients. The AR patients show clearly distinct protein profiles for the 31 differentially abundant proteins compared to the rest of the LTxR groups.
